# Supplementary material for: Facile synthesis of Ag/AgCl/BiPO4 plasmonic photocatalyst with significantly enhanced visible photocatalytic activity and high stability
Source: Royal Society of Chemistry journal article supplement (doi:10.1039/c5ra12479d), 2015-01-01
Supplement: c5ra12479d1.pdf [file c5ra12479d1.pdf]

Fig. S1. N<sub>2</sub> adsorption–desorption isotherms of BiPO<sub>4</sub> and Ag/AgCl/BiPO<sub>4</sub> (15.4%).

Fig. S2. Structural formula of Rhodamine B (RhB), Methyl blue (MB) and Methyl orange (MO).

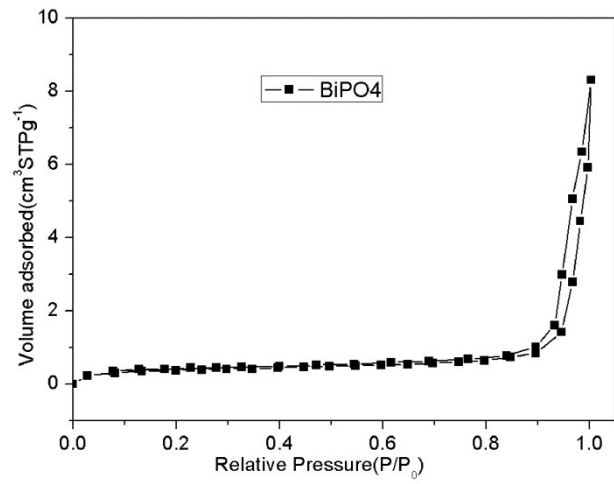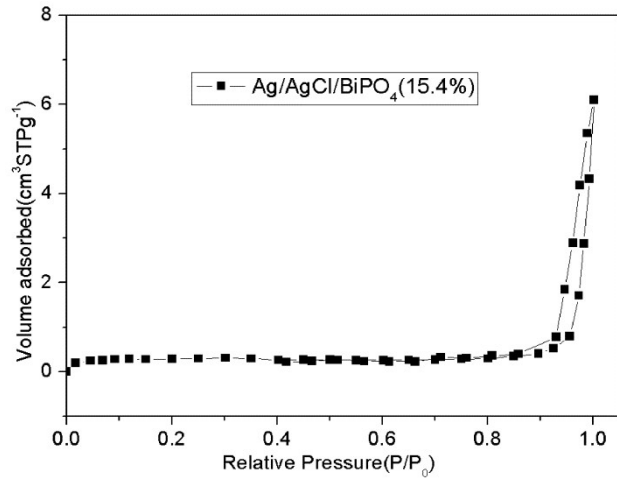

Fig. S1. N<sub>2</sub> adsorption–desorption isotherms of BiPO<sub>4</sub> and Ag/AgCl/BiPO<sub>4</sub> (15.4%).

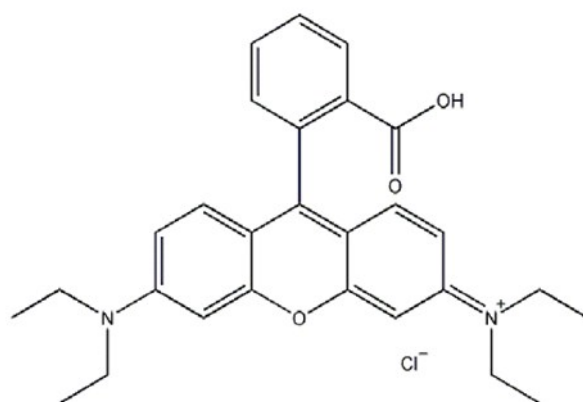

Rhodamine B

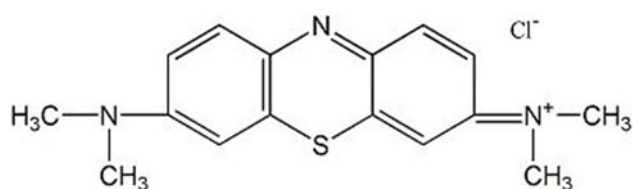

Methyl blue

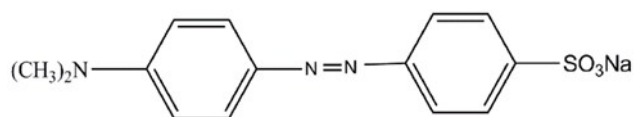

Methyl orange

Fig. S2. Structural formula of Rhodamine B (RhB), Methyl blue (MB) and Methyl orange (MO).
